# Supplementary material for: Intragenic Deletions in FLNB Are Part of the Mutational Spectrum Causing Spondylocarpotarsal Synostosis Syndrome
Source: MDPI journal article supplement (doi:10.3390/genes12040528), 2021-04-05
Supplement: s1 [file s1]

# Supplementary Information

**Table S1.** Primer sequences used for the allele specific PCR reactions.

| Target                                        | Set                 | Primer Sequences            |
|-----------------------------------------------|---------------------|-----------------------------|
| Family A<br>6432 bp deletion<br>(exons 9-12)  | Set 1 (WT, 933 bp)  | F: TTTCCACCATATAACCAGGGAGAC |
|                                               |                     | R: GATCCCCGGAGTTGCAAGAA     |
|                                               | Set 2 (Mut, 262 bp) | F: CAGCTTCTGCTTCCCTGGTTC    |
|                                               |                     | R: GTGCTAAGTGCTACTACCAG     |
| Family B<br>6166 bp deletion<br>(exons 21-24) | Set 1 (WT, 444 bp)  | F: CACTTGC GTTAGGAGAGAGTTGG |
|                                               |                     | R: CCCCCATAGGTTGCCTTAGC     |
|                                               | Set 2 (Mut, 178 bp) | F: GAGCAAATTGCAACAGCCCA     |
|                                               |                     | R: CCCCCATAGGTTGCCTTAGC     |

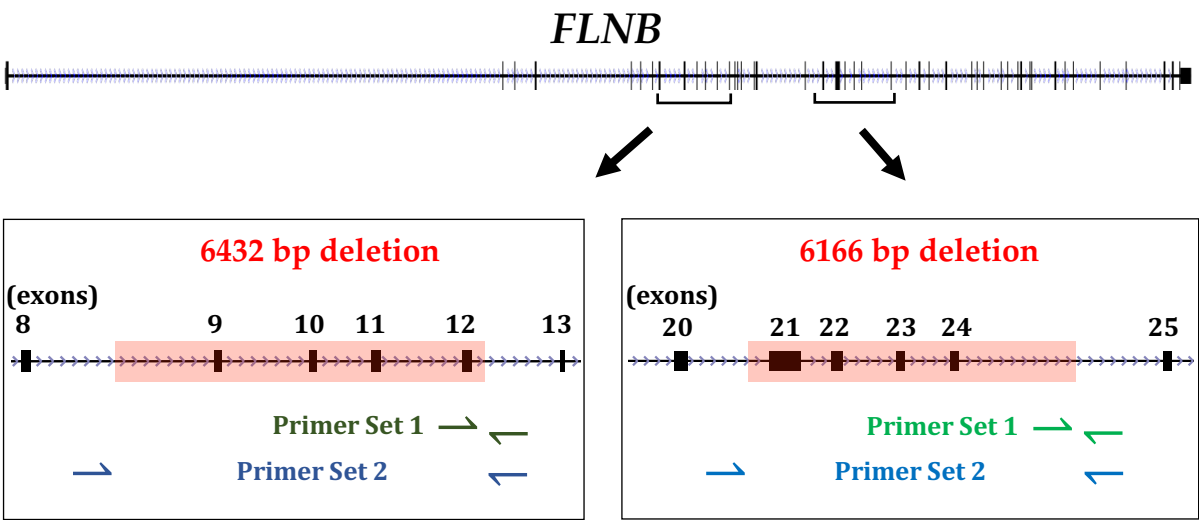

**Figure S1.** Design of the allele specific PCR reactions. At the top is the structure of the *FLNB* gene with vertical bars indicating exons. Lower left shows a zoom in of the region containing the 6432 bp deletion encompassing exons 9-12 which was found in family A. Lower right shows the 6166 bp deletion encompassing exons 21-24 which was found in family B. In both pictures, the positions of the primers are indicated using harpoon arrows. Set 1 was designed with the forward primer within the deletion so that amplification only occurs from the wild-type allele. Set 2 was designed with both primers outside the deletion so that amplification only occurs from the deletion-containing allele since any products from the wild-type allele would be too large for the cycling conditions used.
